# Supplementary material
Source: HighWire-hosted journal article supplement (https://www.cancerbiomed.org/content/18/1/74)
Supplement: media-1 [file media-1.pdf]

## Supplementary materials

**Table S1** Primers involved in TaqMan and PCR reactions using PCR

| Gene name      | Primer sequence            |
|----------------|----------------------------|
| MEIOB-Forward  | 5'-GACTGATCACACAGGCACCC    |
| MEIOB-Reverse  | 3'-ATTGCAAGAACTCATGTACCGTG |
| CDK2-Forward   | 5'-TGGCGCTTAAGAAAATCCGC    |
| CDK2-Reverse   | 3'-GCGAGTACCATCTCAGCAA     |
| CDK4-Forward   | 5'-AATGTTGTCCGGCTGATGGA    |
| CDK4-Reverse   | 3'-GTGCCATCTGGTAGCTGTAGA   |
| PARPBP-Forward | 5'-AAGGCCAAAACAGCAGGGAT    |
| PARPBP-Reverse | 3'-GCTGCTTCTTCGTCAAAAGA    |
| POLQ-Forward   | 5'-CCCTGTACCGCTTTTGGAGT    |
| POLQ-Reverse   | 3'-TGATATCTGCCAGCTTCTACA   |
| RTEL1-Forward  | 5'-TCCTTTGACCTGACTCCCCA    |
| RTEL1-Reverse  | 3'-GCCCTTGGTCTGAAACGTGA    |
| GAPDH-Forward  | 5'-TGCACCACCAACTGCTTAGC    |
| GAPDH-Reverse  | 3'-GTCTTCTGGGTGGCAGTGATG   |

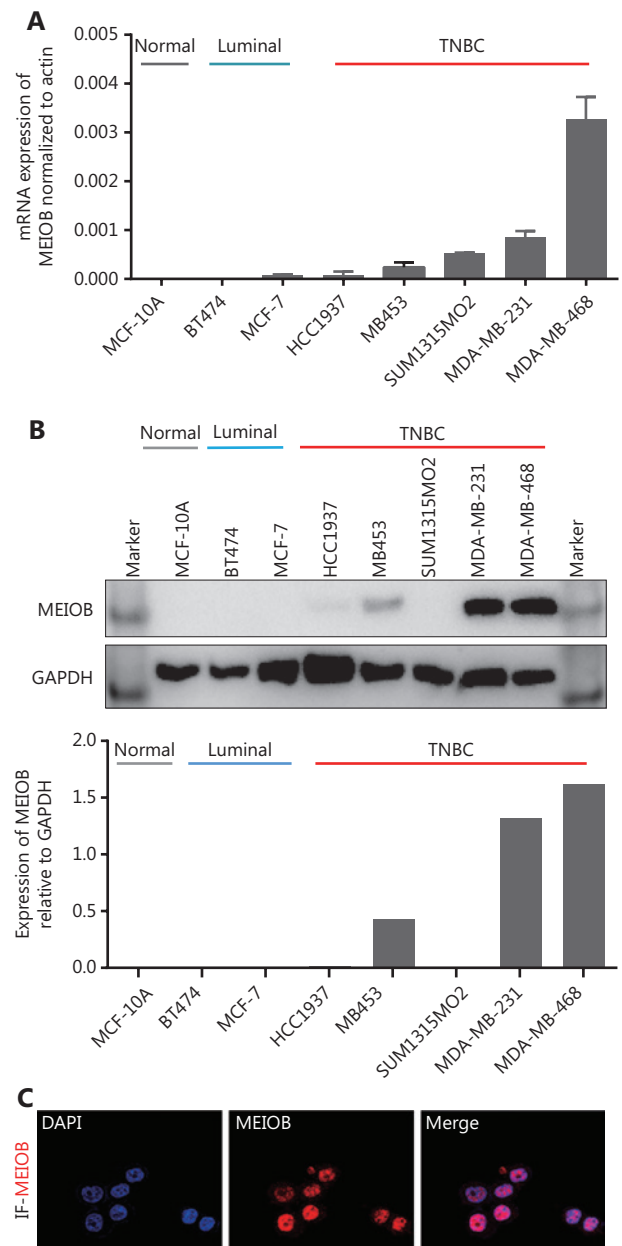

**Figure S1** Expression of MEIOB in multiple breast cancer cell lines. (A and B) The mRNA (A) and protein (B) expressions of MEIOB were significantly higher in MDA-MB-231 and MDA-MB-468 cells than other cell lines. The protein expression of MEIOB relative to glyceraldehyde 3-phosphate dehydrogenase was quantified by ImageJ software. (C) Immunofluorescence analysis of MEIOB localization in MDA-MB-231 cells (red, MEIOB; blue, nuclei), showed that the MEIOB protein was located in the nucleus.

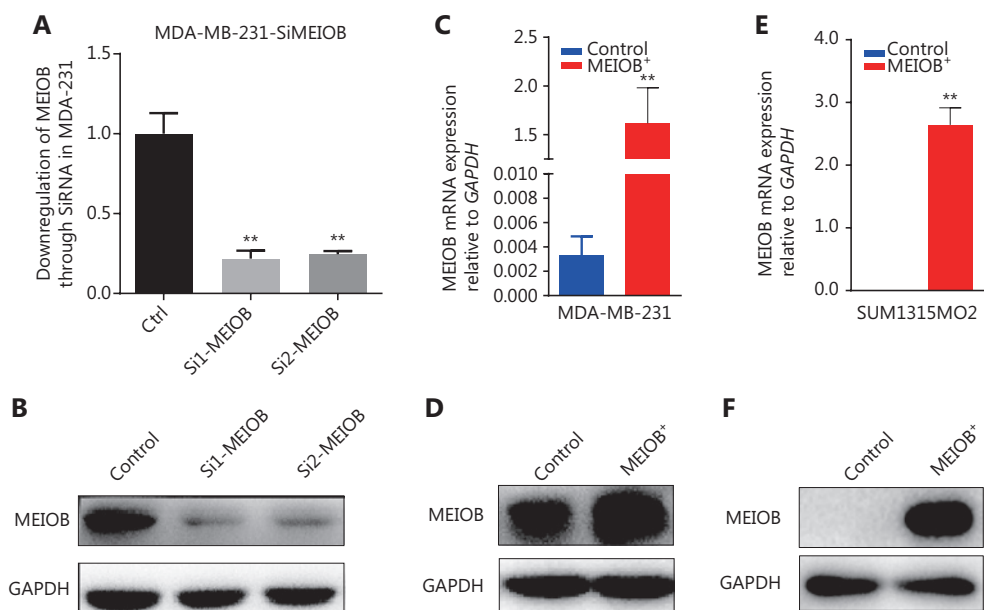

**Figure S2** Validation of MEIOB expression in knockdown and overexpressed cells. (A and B) MEIOB was knocked down in MDA-MB-231 cells by siRNAs and was verified by RT-PCR (A) and Western blot (B). (C–F) MEIOB was overexpressed in MDA-MB-231 cells. The mRNA expression is shown in (C) and protein expression is shown in (D) and SUM1315MO2 cells. The mRNA expression is shown in E and protein expression is shown for all data and are expressed as the mean  $\pm$  SEM, \*\* $P < 0.01$ .

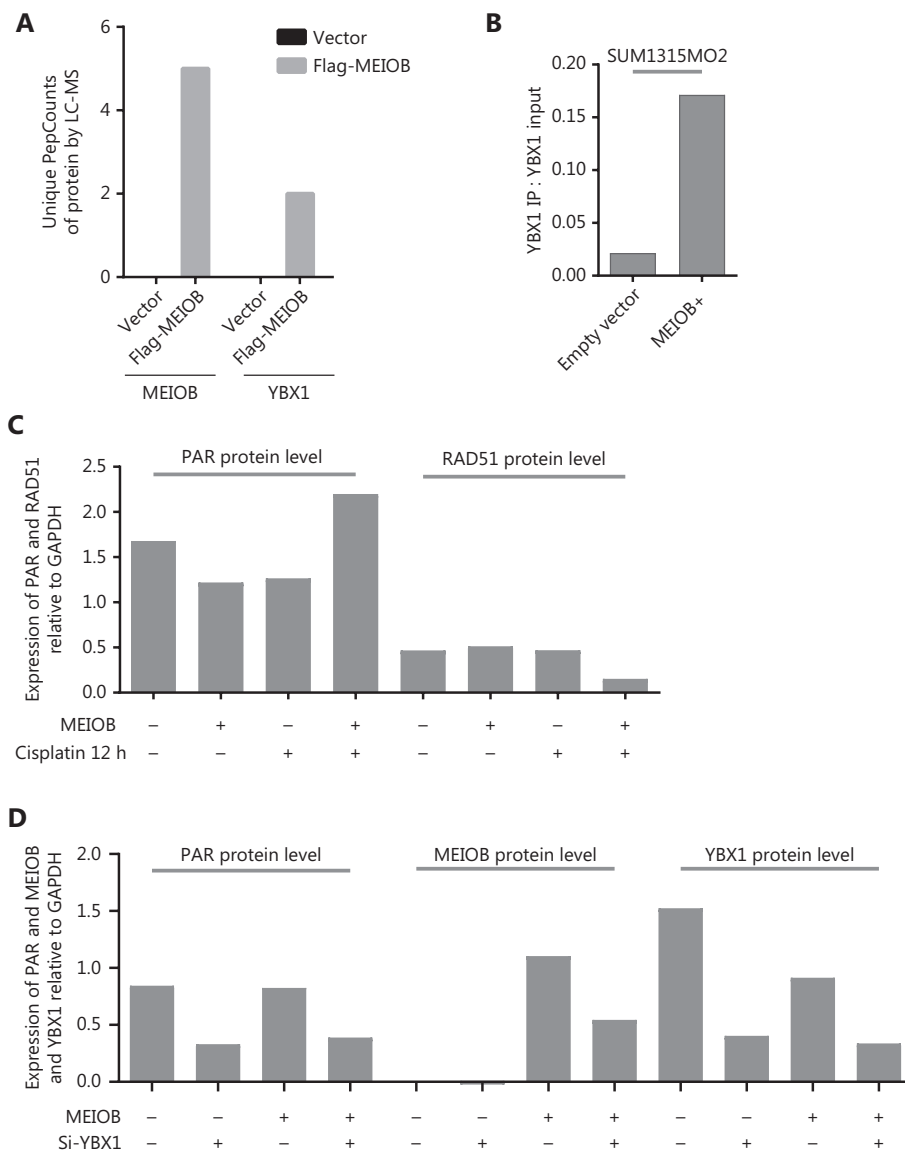

**Figure S3** MEIOB binds with YBX1 and activates PARP1-related repair. (A) Liquid chromatography-tandem mass spectrometry for MEIOB and YBX1. Unique peptide counts of MEIOB and YBX1 in SUM1315MO2 cells based on co-immunoprecipitation assays and mass spectrometry analyses. (B) The protein expression of YBX1 binding to MEIOB relative to glyceraldehyde 3-phosphate dehydrogenase was quantified by ImageJ software. (C) The quantified protein expression of PAR and RAD51 in overexpressed SUM1315MO2 cells after 20  $\mu$ M cisplatin treatment for 12 h. (D) The quantified protein expression of PAR, MEIOB, and YBX1 in overexpressed SUM1315MO2 cells transfected with Si-YBX1 after 20  $\mu$ M cisplatin treatment for 12 h.

**Table S2** A list of differential MEIOB-interacting protein candidates involved in DNA repair processes based on co-immunoprecipitation assays and mass spectrometry analyses

| UniProt ID | Gene name | UniquePep Counts |         | Cover percent (%) | Length of AA | Reference for DNA repair |
|------------|-----------|------------------|---------|-------------------|--------------|--------------------------|
|            |           | MEIOB-tag        | Control |                   |              |                          |
| Q8N635     | MEIOB     | 5                | 0       | 11.76%            | 442          | 24240703,26520106        |
| B2RDN9     | G22P1     | 2                | 0       | 3.94%             | 609          | 29247009,28959970        |
| E9PHA6     | MSH2      | 2                | 0       | 2.17%             | 934          | 27590317,29892060        |
| Q6PKI6     | YBX1      | 2                | 0       | 13.53%            | 324          | 27667193,14718551        |

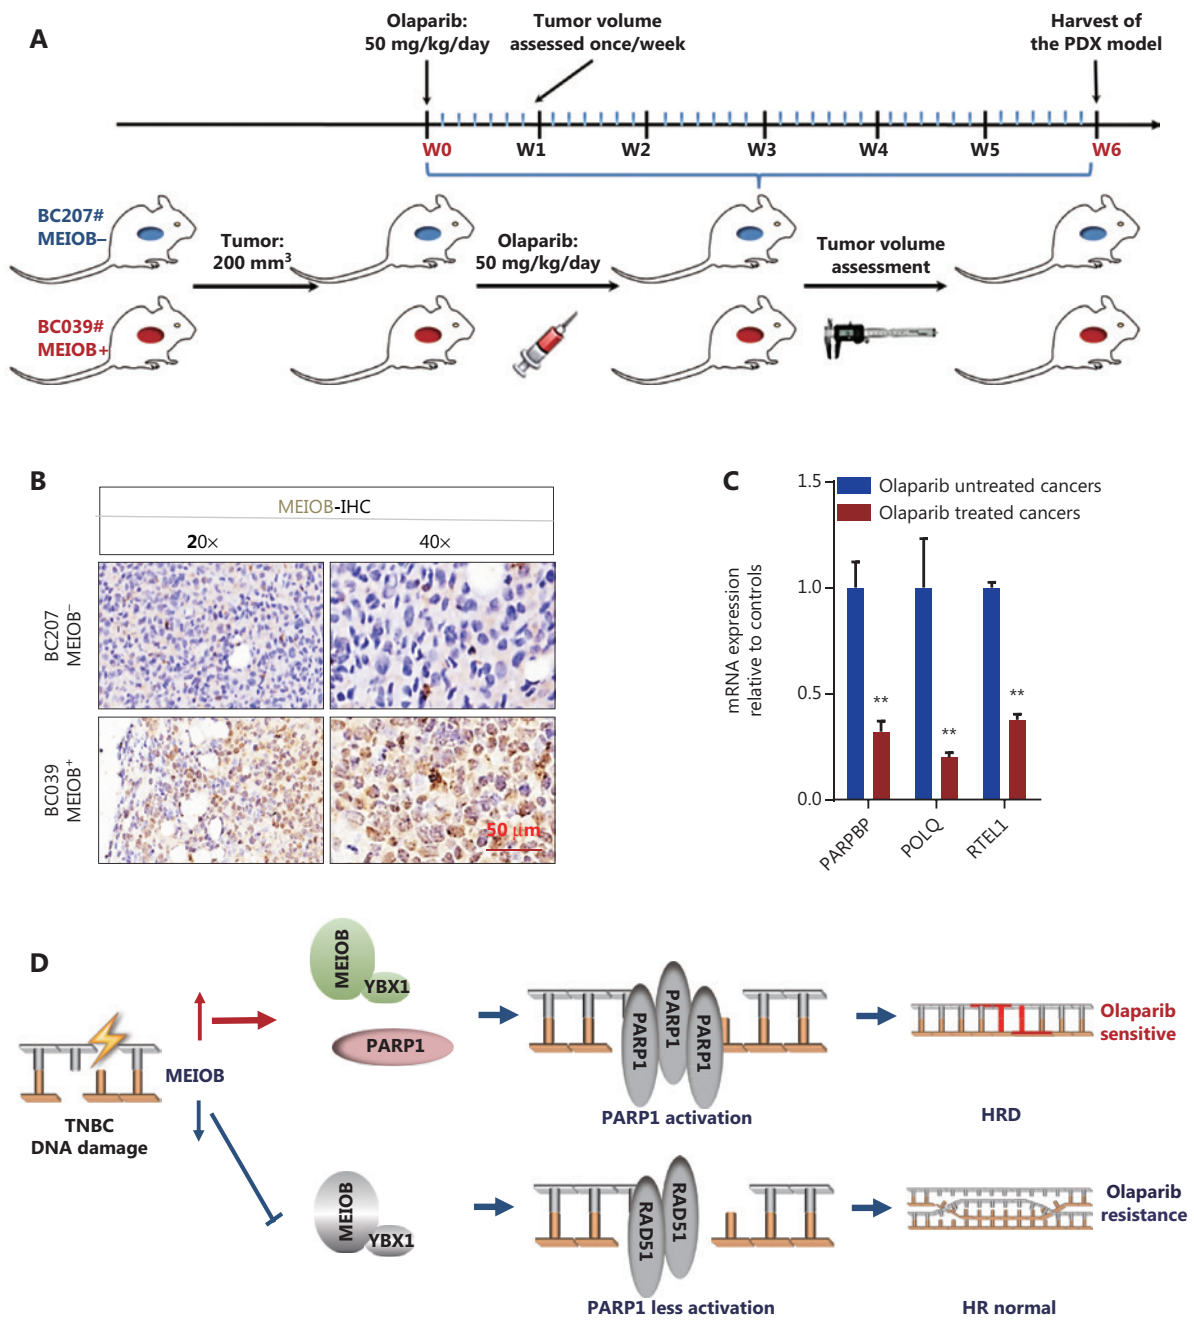

**Figure S4** MEIOB sensitizes TNBC to PARP1 inhibitors in patient-derived xenograft (PDX) models. (A) Schematic of the PDX model. We divided all the tumor tissues into 2 groups according to MEIOB expression levels (MEIOB<sup>+</sup> and MEIOB<sup>-</sup>). Both groups were treated with olaparib when the tumor volume had reached 200 mm<sup>3</sup>. Tumor volumes were measured once a week. Six weeks later, the tumors were harvested and weighed. (B) MEIOB protein levels of patient-derived xenografts were evaluated by immunohistochemical analyses. (C) RT-PCR analysis was performed to verify the signaling identified by Gene Ontology analysis. Data are expressed as the mean ± SEM, *n* = 3/groups, \*\**P* < 0.01. (D) Graphic abstract shows the tumor-promoting role of MEIOB binding with YBX1 and sensitizing the triple-negative breast cancers to the PARP1 inhibitor.
